# Supplementary material for: Flap Thickness and the Risk of Complications in Mechanical Microkeratome and Femtosecond Laser In Situ Keratomileusis: A Literature Review and Statistical Analysis
Source: MDPI journal article supplement (doi:10.3390/diagnostics11091588), 2021-08-31
Supplement: s1 [file s1]

## **Supplementary Materials**

### **Search strategy**

Literature searches of the PubMed and Web of Science databases were conducted in Jul 15, 2021; the search strategies are as follows. Specific limited update searches were conducted after Jul 15, 2021.

#### **1. PubMed Search (Publication Date 1/1/1900–7/15/2021)**

((“corneal flap”[Title]) OR (“femtosecond laser”[Title]) OR (“mechanical microkeratome”[Title])) AND (“laser in situ keratomileusis”[Title]) OR (“laser-assisted in situ keratomileusis”[Title]) OR (“LASIK”[Title])). 362 references.

#### **2. Scopus (Publication Date 1/1/1900–7/15/2021)**

(TITLE(“corneal flap”) OR TITLE(“femtosecond laser”) OR TITLE(“mechanical microkeratome”)) AND (TITLE(“laser in situ keratomileusis”) OR TITLE(“laser-assisted in situ keratomileusis”) OR TITLE(“LASIK”)). 476 references

After removing duplicates 495 publications were analyzed. Finally, 114 articles were considered as relevant.
